23 of *C. japonica* such as Mesoflavibacter have a mutually reinforcing relationship with  
24 Phaeobacter, Colwellia, Bacillus, Psychrobacter and Cohaesibacter. Conditional  
25 pathogenic bacteria in the gut of healthy crabs may also have such a symbiotic  
26 relationship with intestinal probiotics, promoting their growth and reproduction. For  
27 example, Phormidium has a mutualistic relationship with *Aeromonas* and Azopira.  
28 Metabolites in the gut of *C. japonica* infected with *A. hydrophila*, including beta-  
29 alanine metabolism, nitrogen metabolism, inositol phosphate metabolism, galactose  
30 metabolism, histidine metabolism, ascorbate and arginine and proline metabolism  
31 were increased, with alanine metabolism being the most abundant. The activity of  
32 metabolite related enzymes such as lipid peroxidase, phenoloxidase, superoxide  
33 dismutase, nitric oxide synthase, glutathione transferase and mid-glutathione  
34 decreased and NO levels also decreased. The positive correlation with the probiotic  
35 flora suggests that metabolites increase with bacterial abundance and that microbial  
36 metabolites or co-metabolites can, in turn, achieve many pleiotropic effects to resist  
37 invasion by *A. hydrophila*. These results may contribute to further research in the  
38 resistance of *C. japonica* to invading pathogens.

### 39 **Importance**

40 With the rapid development of the *C. japonica* farming industry, investors, in pursuit  
41 of economic benefits, have encountered problems such as frequent outbreaks of  
42 various diseases, resulting in high mortality and huge economic losses. The open  
43 water circulation system can give rise to several crab bacterial diseases. Among these,  
44 *A. hydrophila* is a pathogenic bacterium affecting fish and crustaceans, which leads to

45 huge economic losses. Our results suggest that metabolites increased with the  
46 abundance of bacteria. It is possible that the autoimmune system and the entry of *A.*  
47 *hydrophila* into the intestinal tissues of *C. japonica* react immunologically and that  
48 the organism is producing certain metabolites which may be metabolised by various  
49 bacteria and absorbed into the circulation. In addition, some of these metabolites are  
50 modified or bound in the hepatopancreas to produce microbiota-host co-metabolites.  
51 These microbial metabolites or co-metabolites can resist invasion by *A. hydrophila*.

52 **Key words:** Metabolome, innate immunity, 16S rRNA, *Charybdis japonica*,  
53 *Aeromonas hydrophila*

54

## 55 **1. Introduction**

56 *Charybdis japonica* is found as an important edible species in the intertidal zone  
57 along the west coast of the Pacific Ocean, including China, Japan and Malaysia. The  
58 habitat of *C. japonica* is frequently affected by pathogenic bacteria of the *Vibrio*  
59 family(1). *A. hydrophila* belongs to the family Vibrionaceae and the genus *Aeromonas*,  
60 which is a group of thermophilic hydrophilic *Aeromonas*. It is ubiquitous in nature, is  
61 pathogenic to aquatic animals (2) and can cause septicaemia in various aquatic  
62 animals, bringing economic losses to the freshwater aquaculture industry, thus  
63 attracting the attention of fisheries, veterinary and medical researchers (3). In  
64 aquaculture, a complex micro-ecosystem exists in the gut that functions for digestion,  
65 nutrient absorption and disease resistance (4). The gut-associated microbiota plays a  
66 unique role in host gut development, immune response, disease resistance and

67 homeostasis. Beneficial strains of bacteria and beneficial metabolites have been  
68 introduced into the host gut with significant results(5). The microbial composition of  
69 the gut of crustaceans has a significant impact on animal health, growth and survival.  
70 Factors such as the internal structure of shrimps and crabs, host conditions, diet,  
71 climate change, living environment, and bacterial or viral infections can all affect the  
72 gut flora of aquatic animals(5). This experiment is designed to understand the role of  
73 bacteria in the gut of crabs, firstly by understanding the composition of host gut  
74 bacterial flora. Secondly, it is important to discover the changes in the composition of  
75 the gut bacterial flora after infection with the bacteria.

76

77 For crabs, the microbial diversity of crab carapace, gut and haemolymph fluid was  
78 studied by using 16S rRNA gene analysis, cloning and sequencing (6), and various  
79 potential pathogens were examined, such as *Alternaria alternata*, *Bacillus*,  
80 *Escherichia coli*, photobacterium subspecies and *Vibrio harveyi*. They have greatly  
81 expanded our view of the microbial life associated with marine invertebrates, such as  
82 microbial community composition, functional potential and metabolic activity (7). In  
83 recent years, the diversity of gut microbes in a variety of aquatic animals has been  
84 studied based on 16S rRNA genes, and the gut microbial diversity of shrimp has been  
85 investigated by molecular isolation (8). A comparison of the gut microbiota of healthy  
86 and diseased crabs revealed that the relative abundance of bacteria in healthy crabs  
87 was higher than in diseased crabs (9). *Scylla paramamosain* was infected with *Vibrio*  
88 *vulnificus* and strains were screened for antagonistic activity against *Vibrio*

89 *parahaemolyticus* using an agar spot assay. The antagonistic strains were then  
90 identified by 16S rRNA gene sequence analysis (10). The 16SrRNA method has been  
91 important in the analysis of crab infection with bacteria.

92

93 Metabolomics is a method of histological measurement and an important tool in  
94 histology. Metabolomics methods allow the unbiased analysis of the composition of  
95 all detectable metabolites, and thus, rapid quantitative detection of stress  
96 responses(11). Metabolomics has been shown to provide in-depth research data in  
97 crab diet, climate change, living environment, physiology and pathology and  
98 biochemistry (12). *A. hydrophila* infects aquatic animals through incidental bruises on  
99 the body. Metabolomics is also an important tool to study the innate immunity of *C.*  
100 *japonica*.

101

102 This experiment first studied the innate immunity of *C. japonica* infected with *A.*  
103 *hydrophila*. The aims of the study were 1) to examine the composition of the intestinal  
104 bacterial flora by the 16S rRNA sequencing technique, discover the changes in the  
105 composition of the intestinal bacterial flora after infection with *A. hydrophila*; 2) to  
106 find differential metabolites and the function of these metabolites through  
107 metabolome sequencing; 3) to investigate and understand the relationship between  
108 metabolites and gut microbes by integrating metabolomics data with gut microbial  
109 16S rRNA datasets using bioinformatics tools; 4) to analyse relevant enzyme  
110 activities that affect metabolites.

111

## 112 **2. Experimental methods**

### 113 2.1. Experimental materials

114 Samples of *C. japonica* were collected from the South China Sea. The crabs weighed

115  $81 \pm 3.4$  g and body length and width were  $8 \pm 1.7$  cm and  $6 \pm 1.6$  cm, respectively.

116 One hundred and twenty *C. japonica* were divided equally into six aquariums with

117 identical nets and PVC pipes to act as a shelter for the animals and prevent

118 cannibalism. They were fed (9812; Shanghai Harmony Feed Co., Ltd., China) at 8:00

119 and 18:00 daily with the equivalent of 5% of the body weight of a pair of *C. japonica*.

120 The crabs were exposed to seawater using an artificial sea salt cycle (salinity 28 psu),

121 with water temperature controlled at  $25 \pm 1^\circ\text{C}$ , pH  $8.0 \pm 0.2$ , a dissolved oxygen

122 concentration of  $5.0 \text{ mg L}^{-1}$  and a 12 h light/dark cycle.

123 After 2 weeks of acclimation, water quality was maintained at the same level as in the

124 acclimation period. Animals were not fed commercial feed for 24 hours before the

125 trial. Sixty animals were removed from three aquaria for bacterial infection

126 experiments, and  $10^5$  CFU/L of *A. hydrophila* was injected into the fourth leg. An

127 equal amount of saline was injected into the fourth leg of 60 animals in the remaining

128 three aquaria, and samples were collected 24 hours later. Intestinal and

129 hepatopancreas tissue was collected with sterile scissors and forceps after

130 anaesthetizing the crabs on ice. All intestinal tissues and hepatopancreas were then

131 rapidly frozen in liquid nitrogen and stored at  $-80^\circ\text{C}$  for subsequent experiments. To

132 avoid errors due to individual differences, composite samples were prepared by

133 mixing equal amounts of each group of intestinal tissues and then aliquoting them into  
134 two samples. Some samples were assayed for relevant immune genes and enzymes.  
135 The *A. hydrophila* for this study was provided by Shanghai Ocean University. *A.*  
136 *hydrophila* freezing tubes were removed from storage at  $-80^{\circ}\text{C}$  and quickly  
137 transferred to a water bath at  $37^{\circ}\text{C}$  to rapidly dissolve the bacterial freezing tract  
138 solution. After observation, to ensure that *A. hydrophila* was free of contamination,  
139 LB solid plates were recoated with bacteria and incubated in a constant temperature  
140 incubator at  $28^{\circ}\text{C}$  for 20 h. The *A. hydrophila* were grown to log phase and diluted to  
141  $10^5$  cfu/L by the McElloby method.

142

## 143 2.2. DNA extraction and PCR amplification

144 The mixed intestinal tissues were subjected to total DNA extraction using an  
145 E.Z.N.A.® soil kit (Omega Bio-Tek, Norcross, GA, USA). DNA concentration and  
146 purity were assayed using NanoDrop2000. DNA extraction quality was checked by 1%  
147 agarose gel electrophoresis. PCR amplification of V3-V4 was performed using  
148 primers 338F (5' -ACTCCTACGGGAGGCAGCAG-3') and 806R (5' -  
149 GGACTACHVGGGTWTCTAAT-3'). PCR products were recovered using a 2%  
150 agarose gel, and purified using the AxyPrep DNA Gel Extraction Kit (Axygen  
151 Biosciences, Union City, CA, USA), eluted in Tris-HCl and detected by 2% agarose  
152 electrophoresis. Quantification was carried out by using QuantiFluor™-ST (Promega,  
153 USA).

154

### 155 2.3. Illumina Miseq sequencing

156 The purified amplicons were constructed into PE 2\*300 libraries according to the  
157 Illumina MiSeq platform (Illumina, San Diego, USA) standard operating protocols.  
158 The raw sequence fastq files were imported into a file format ready for subsequent  
159 processing by QIIME2. The QIIME2 dada2 plug-in was then applied for quality  
160 control, pruning, denoising, splicing and removal of chimeras to obtain the final  
161 table of characteristic sequences. Next, the ASV representative sequences were  
162 compared to the 99% similarity GREENGENES database (the database was trimmed  
163 to the V3V4 region based on the 338F/806R primer pair) to obtain a taxonomic  
164 information table for the species, removing all contaminating mitochondria. Methods  
165 such as ANCOM, ANOVA, Kruskal Wallis, igraph, LEfSe and DEseq2 were used to  
166 identify groupings. The R package "mixOmics" was used for bacteria with differences  
167 in abundance between samples, and partial least squares discriminant analysis (PLS-  
168 DA) was used as a supervised discriminant analysis statistical method to reveal the  
169 relationship between microbial communities and sample classes and to enable the  
170 prediction of sample classes based on the relative abundance of the main microbial  
171 species in the sample. We also used co-occurrence analysis to calculate Spearman's  
172 rank correlation coefficients, which were used to understand associations between  
173 species. In addition, PICRUST software was used to predict the likely functional  
174 composition of the microbial community. Unless specifically noted, the parameters  
175 used in the above analyses are the default settings.

176



177 2.4. Metabolite extraction

178 Intestinal tissue (100 mg) was placed into a 5 mL tube (reduced by equal proportions  
179 if the sample size was insufficient) and mixed thoroughly for 1 min with 500  $\mu$ L  
180 ddH<sub>2</sub>O at 4 °C. Methanol (1 mL, -20 °C) and heptadecanoic acid (60  $\mu$ L 0.2 mg/mL)  
181 were added, shaken in a Vortex for 30 s, sonicated for 10 min at room temperature,  
182 left on ice for 30 min and centrifuged at 12 000 g for 10 min at 4 °C. The supernatant  
183 was transferred to a new 1.5 mL centrifuge tube and the sample was concentrated by  
184 vacuum centrifugal concentrator. Methoxy solution (60  $\mu$ L) was added and shaken in  
185 a Vortex for 30 s. The reaction was carried out at 37 °C for 2 h. Finally, 60  $\mu$ L of  
186 reagent (containing 1% trimethylchlorosilane) was added and the reaction was carried  
187 out at 37 °C for 90 min and centrifuged at 10 000 g for 10 min at 4 °C. The reaction  
188 was carried out at 37 °C for 90 min and centrifuged at 10 000 g for 10 min at 4 °C.  
189 The supernatant was added to a vial and part was used in quality control to correct for  
190 deviations in the results of mixed samples and errors caused by the analytical  
191 instrument, the remaining sample was used for GC-MS.

192

193 2.5. On-board testing

194 Gas chromatography was performed on an HP-5MS capillary column (5% benzene/95%  
195 methyl polysiloxane 30 m  $\times$  250  $\mu$ m i.d., 0.25  $\mu$ m film thickness, Agilent J & W  
196 Scientific, Folsom, CA, USA) with a constant flow of helium at 1 mL/min. The 1  $\mu$ L  
197 sample was injected through an autosampler at a 20:1 split ratio. The injection  
198 temperature was 280 °C, set to 150 °C for the interface and adjusted to 230 °C for the

199 ion source. Mass spectrometry was performed using a full scan method with a range  
200 of 35 to 750 (m/z)

201

## 202 2.6. Data pre-processing steps

203 The data obtained were subjected to GC-MS metabolomics assays for bioinformatics  
204 analysis. The raw data were converted into netCDF format (xcms input file format)  
205 by an Agilent MSD ChemStation workstation for peak identification, peak filtration  
206 and peak alignment. A data matrix including mass to charge ratio (m/z) and retention  
207 time and peak area (intensity) was obtained. The metabolites were annotated in  
208 conjunction with the AMDIS program using the National Institute of Standards and  
209 Technology (NIST) commercial database and the Wiley Registry Metabolome  
210 database. The metabolite alkane retention indices were provided according to The  
211 Golm Metabolome Database (GMD) (<http://gmd.mpimp-golm.mpg.de/>) and used for  
212 further substance characterisation. The detailed data results, which are normalised  
213 internally to allow for comparison between different quantities of data.

214

## 215 2.7. Measuring the activity of hepatopancreas-related enzymes

216 Hepatopancreas (100 mg) was homogenised with nine times the volume of  
217 physiological saline solution by weight to make a 10% tissue homogenate. The  
218 homogenate was centrifuged at 2500 rpm at 4°C for 10 min and the supernatant was  
219 placed on ice for assays. The activities of hepatopancreas-related enzymes were  
220 measured using kits from the Nanjing Jiancheng Company. Protein concentrations

221 were determined by the Folin-phenol method and hexokinase activity was determined  
222 by a colourimetric method coupled to 6-phosphoglucose dehydrogenase. Superoxide  
223 dismutase (SOD), phosphofructokinase (PFK), pyruvate kinase (PK), nitric oxide  
224 synthase (i-NOS), lipid peroxidase (LPO), phenoloxidase (POX), glutathione  
225 transferase (GST), glutathione (GSH), glutathione peroxidase (GPX) and glutathione  
226 reductase (GR) were tested according to the manufacturer's instructions. GPX was  
227 measured at 412 nm absorbance, GSH at 405 nm absorbance and GST at 412 nm  
228 absorbance. GST was measured by absorbance at 340 nm using 1-chloro-2,4-  
229 dinitrobenzene as the substrate. The absorbance of each tube was measured at 550 nm  
230 with a 1 cm optical diameter of 0.4 mm inner diameter and blanked with distilled  
231 water to detect nitric oxide (NO).

232

### 233 **3. Results**

#### 234 *3.1. C. japonica* 16S rRNA sequencing data

235 After removing low-quality reads, a total of 577,767 valid reads were obtained from  
236 the 12 samples. The highest number of valid reads in all the samples of AH1 was  
237 58,952 (Figure 2A) and the lowest number of valid reads in all the samples of CK was  
238 32,453. The mean value of valid reads was 48,147.25. The highest number of  
239 optimized non-chimeric sequences in all the samples of AH1 was 42540 and the  
240 lowest number of optimized non-chimeric sequences in CK6 was 14226. The  
241 abundance of microorganisms in the gut of *C. japonica* can be assigned to the most  
242 classifiable taxa such as phylum, phylum, order, family and genus. Of the total 48

243 samples from the three groups, 99% of the phylotypes belonged to only four core  
244 phyla: Proteobacteria (0.92%), Tenericutes (5.21%), Fusobacteria (2.61%) and  
245 Bacteroidetes (0.73%; Figure 2).

246

### 247 3.2. Annotation and assessment of species

248 The distribution of the four dominant phyla was relatively similar across samples in *C.*  
249 *japonica* infected with *A. hydrophila*, but with different trends in abundance and  
250 variation. Figure 2 shows that there were 84 CK endemic species, 77 AH endemic  
251 species and 110 shared species. Alpha diversity indices were analysed (Figure 2B) for  
252 both richness and evenness of species composition in the 12 samples. Figure 2C  
253 shows that there were only 10 samples with a Shannon index of 2 or more for AH and  
254 CK.

255

### 256 3.3. Species-specific phylogenetic analysis

257 The phylogenetic evolutionary tree in Figure 3A for Polaribacter and Mesoflavibacter  
258 shows that the relative abundance of AH of Polaribacter after infection with *A.*  
259 *hydrophila* was 0.442326. The relative abundance of AH of Mesoflavibacter after  
260 infection with *A. hydrophila* was 0.216081. The relative abundance of Photobacterium  
261 in Firmicutes and Proteobacteria in the phylogenetic evolutionary tree was 0.421645  
262 after infection with *A. hydrophila* and 0.288675 after infection with *Rhodobacter*  
263 *hydrophila*. In the phylogenetic tree, Psychroserpens in Fusobacteria had a higher AH  
264 relative abundance of 0.290992 after infection with *A. hydrophila*, and Fusibacter in

265 Firmicutes had a higher AH relative abundance of 0.288675 after infection with *A.*  
266 *hydrophila*. The relative abundance of Phormidium in Cyanobacteria was 0.288675  
267 after infection with *A. hydrophila*.

268

#### 269 3.4 Species interaction network analysis

270 As can be seen in Figure 3B, Rhodobacter has a mutually supportive relationship with  
271 Emticia, Sphingobium, Bacillus, Haliscomenobacter and Reyranela. Polaribacter has  
272 a mutually reinforcing relationship with Marinomonas and Bizionia and Polaribacter,  
273 whereas Hepatoplasma has a suppressive effect. Psychrilyobacter also has a mutually  
274 reinforcing relationship with Alteromonas, Shewanella, WH1\_8. Mesoflavibacter has  
275 a mutually promoting relationship with Phaeobacter, Colwellia, Bacillus,  
276 Psychrobacter and Cohaesibacter.

277

#### 278 3.5 Statistical analysis of metabolites

279 Percentage content of 20 metabolites in the gut of *C. japonica*: Glycine in AH  
280 (0.069%), CK (0.075%); Galactose in AH (0.073%), CK (0.63%); Proline in AH  
281 (0.068%), CK (0.063%); Tyrosine in AH (0.063%), CK (0.059%). Leucine in AH  
282 (0.059%), CK (0.059%); Phosphoric acid in AH (0.053%), CK (0.058%); Glucose in  
283 AH (0.061%), CK (0.050%) (Figure 4A). These findings demonstrate that there is still  
284 a direct difference between AH and CK. PLS-DA looks for factors that can find the  
285 maximum distinction between sample groupings (a factor can be interpreted as a  
286 weighted sum of all metabolites). Discriminant analysis encodes the discontinuous

287 categorical variable to be predicted as a latent variable, which is continuous, so that a  
288 regression can be created between the explanatory and latent variables and solved  
289 using the theory of least squares regression. PLS-DA finds a linear regression model  
290 by projecting the predictor and observed variables separately into a new space (the  
291 dimensions of the new space are independent of each other and there is no covariance  
292 problem). In Figure 4B, each point corresponds to a sample and the PLS-DA effect  
293 plot is the value of the two factors that discriminate the best. The AH samples were  
294 found to be concentrated on the left side of the PLS-DA effect plot and CK on the  
295 right side of the PLS-DA effect plot.

296

### 297 3.6 Metabolic pathway analysis

298 The degree of reduction in the predictive accuracy of the random forest by making the  
299 value of a metabolite a random number is the "Mean Decrease Accuracy". Among the  
300 15 most important metabolites, glucose, 9-Z-octadecenoic acid, 4-hydroxyproline and  
301 1-monohexadecanoylglycerol increased the most in *C. japonica* infected with *A.*  
302 *hydrophila* (Figure 4C). The levels of xylitol, ornithine and uracil were decreased in *C.*  
303 *japonica* infected with *A. hydrophila*. The metabolic pathways that were significantly  
304 enriched in differential metabolites are shown in Figure 5A. Metabolites that  
305 increased in the gut of *C. japonica* after infection with *A. hydrophila* were associated  
306 with beta-alanine metabolism, nitrogen metabolism, inositol phosphate metabolism,  
307 galactose metabolism, histidine metabolism, ascorbate and aldarate metabolism, fatty  
308 acid biosynthesis, aminoacyl-tRNA biosynthesis and arginine and proline metabolism.

309 As can be seen in Figure 5C, alanine, beta-alanine, carnosine and L-histidine levels  
310 were increased.

311

312 3.7. 16S rRNA and metabolite association analysis

313 Polaribacter showed a positive correlation with pyruvic acid, myo-inosit-1-phosphate,  
314 beta-alanine , glutamic acid, histidine, galactose and galactonic acid. Mesoflavibacter  
315 showed a positive correlation with pyruvic acid , myo-inosit-1-phosphate , beta-  
316 alanine , glutamic acid, histidine and alanine. Psychrilyobacter showed positive  
317 correlations with alanine, myo-inositol, glycerol-3-phosphate, arginine and malic acid.  
318 Fusibacter showed a positive correlation with alanine, myo-inositol, glycerol-3-  
319 phosphate, arginine and malic acid. Rhodobacter showed positive correlations with  
320 malic acid , Glutamine and histidine (Figure 5B). Photobacterium showed positive  
321 correlations with beta-alanine, alanine and histidine. Phormidium also showed  
322 positive correlations with beta-alanine, alanine and glutamine. The activity of  
323 metabolite related enzymes such as lipid peroxides, SOD, i-NOS, GST, GSH, LPO,  
324 GPX and POX showed a downward trend as shown in Figure 8. The activity of THL,  
325 HK and PK enzymes was upregulated. The level of NO also showed a downward  
326 trend (Figure 6).

327

#### 328 **4. Discussion**

329 The relative abundance of some beneficial intestinal genera including Photobacterium,  
330 Rhodobacter, Polaribacter, Mesoflavibacter, Fusibacter and Phormidium was

331 increased in *C. japonica* after infection with *A. hydrophila*. *Litopenaeus vannamei* had  
332 a significantly higher abundance of gut Photobacterium after infection with white spot  
333 syndrome virus (WSSV), which inhibits the composition and function of the gut  
334 microbiota in vivo and prevents WSSV infection (13). Research over the years has  
335 found that the most predominant species in healthy fish is Rhodobacter, and that co-  
336 culture with Roseobacter isolates and *Vibrio anguillarum* in artificial seawater-based  
337 phytoplankton media reduces the viability of *Vibrio anguillarum* by approximately  
338 10-fold or more (14). Cultivation of Phaeobacter and Vibrio together under different  
339 growth conditions antagonised *Vibrio anguillarum*, reducing the number (15).  
340 Alkaloids also increased probiotic Rhodobacter during immunostimulatory and  
341 disease resistance in fish (16). Some bacteria in Polaribacter can degrade algal  
342 polysaccharides (17). Phormidium produces lipids such as monogalactose  
343 diacylglycerol and digalactose diacylglycerol, which are anti-inflammatory and  
344 antibacterial active substances (18). The enrichment of Mesoflavibacter in the gut of  
345 American white shrimp fed resistant starch may be involved in the degradation of  
346 toxins and the production of beneficial metabolites, and a significant elevation of  
347 Mesoflavibacter could prevent the reduction of potential pathogens (Formosa and  
348 Pseudoalteromonas) (19). The key bacterial members associated with overweight  
349 shrimps were mainly from Firmicutes (short bacilli and Fusibacter), both of which  
350 were found to be in higher abundance than those with less weight. Fusibacter in  
351 Firmicutes has been identified as a potential probiotic and antimicrobial peptide  
352 producer (20) in sea bass. From the above findings, it is evident that these increased



353 probiotic abundances can suppress *A. hydrophila* through numerical dominance, with  
354 mechanisms that include an anti-pathogenic chemical similar to an interferon protein  
355 molecule that can be induced by bacterial molecules to be released by immune  
356 cells(21). Presumably, this mechanism can interfere with the population sensing of *A.*  
357 *hydrophila* in *C. japonica* pathogens through signal hijacking.

358

359 Increased metabolites in the gut of *C. japonica* after infection with *A. hydrophila*  
360 include beta-alanine metabolism, nitrogen metabolism, inositol phosphate metabolism,  
361 galactose metabolism, histidine metabolism, ascorbate and aldarate metabolism, fatty  
362 acid biosynthesis, aminoacyl-tRNA biosynthesis, arginine and proline metabolism  
363 (Figure 9). In this experiment, the metabolites of nitrogen and histidine were more  
364 abundant in the gut of *C. japonica* after being infected with *A. hydrophila*. Nitrogen is  
365 a key element in biological systems; it is a fundamental component of amino acids,  
366 proteins and nucleic acids. Most amino acids are broken down in the liver, while some  
367 can be broken down in the intestine(22). In hepatocytes, several amino acids can be  
368 degraded by specific histidases and  $\text{NH}_3$  is released in the cytosol (23). Aquatic  
369 animals excrete 50% of their nitrogenous waste as ammonia (24). Certain amino acids  
370 can be converted to glutamate; they include arginine, glutamine, histidine and proline.  
371 Glutamate is transaminated by alanine transaminase, which catalyses the reaction of  
372 glutamate with pyruvate to form alpha-ketoglutarate and alanine without releasing  
373 ammonia (25). The alpha-ketoglutarate produced can be directed into the tricarboxylic  
374 acid cycle and partially catabolised to malic acid. Malic acid can be directed out of the

375 tricarboxylic acid cycle by malic enzymes and converted to pyruvate. This would  
376 provide a continuous supply of pyruvate to sustain the transamine reaction catalysed  
377 by alanine transaminase to form  $\alpha$ -ketoglutarate and alanine (26). According to this  
378 theory, the metabolites of arginine, histidine and proline in the gut of *C. japonica* after  
379 infection with *A. hydrophila* are less than those of alanine. In this experiment, GPX,  
380 GST and GSH of the glutamate metabolic pathway were measured, and GST and  
381 GSH activities were found to be lower than in normal *C. japonica*, while GPX was  
382 not significantly changed. The activity of these enzymes showed that the glutamate  
383 metabolites were relatively low, inhibiting their redox reactions, and that the excess  
384 glutamate may have been involved in the pyruvate reaction to produce  $\alpha$ -ketoglutarate  
385 and alanine. Metabolites in the gut of *C. japonica* infected with *A. hydrophila* are  
386 most abundant in alanine metabolites, which have two isomers,  $\alpha$ -alanine and  $\beta$ -  
387 alanine. Alanine metabolites are the most important metabolites in the gut of *C.*  
388 *japonica* infected with *A. hydrophila*.

389

390 Myostatin is a dipeptide that is found in high concentrations in skeletal muscle. It is  
391 synthesised by the amino acids L-histidine and  $\beta$ -alanine, catalysed by myostatin  
392 synthase. In this experiment, we found that THL, HK and PK enzyme activities were  
393 upregulated in *C. japonica* after infection with *A. hydrophila*. Myostatin readily  
394 glycosylates with aldose and ketose, inhibits dihydroxyacetone glycosylation of  
395 histidine and Lys residues, and resists glycosylation and cross-linking of ribose,  
396 deoxyribose and fructose(27). The results of our study are quite close to those of

397 Hipkiss et al. In this experiment, we found that lipid peroxidation was reduced in *C.*  
398 *japonica* after infection with *A. hydrophila* and that increased  $\beta$ -alanine metabolites  
399 could potentially reduce the production of free radicals in skeletal muscle and reduce  
400 lipid peroxidation. It was found that the hepatopancreas NO content was reduced and  
401 nitric oxide synthase (i-NOS) activity was also reduced after infection with *A.*  
402 *hydrophila* and that this increased  $\text{NH}_3$  content in nitrogen metabolism and water  
403 reduced blood cell counts and haemocyanin levels, inhibited blood cell phagocytosis,  
404 reduced SOD and phenoloxidase activity, and disrupted immune defence systems,  
405 including immune cells and immune response factors(28). Increased  $\text{NH}_3$ -N in water  
406 is reported to reduce the immunity of crabs to pathogens and their ability to scavenge  
407 free radicals(29). In the present experiment, *C. japonica* showed reduced activity of  
408 SOD and phenoloxidase in the hepatopancreas after infection with *A. hydrophila*.

409

410 The literature that has investigated the interaction between probiotics and pathogenic  
411 bacteria support the idea that probiotics inhibit pathogenic bacteria by competing for  
412 adhesion sites (30), aggregating with pathogenic bacteria and producing metabolites  
413 (31). However, the presence of conditionally pathogenic bacteria in the gut does not  
414 disappear with the presence of intestinal probiotics, suggesting that there may be  
415 interactions between probiotics and pathogenic bacteria other than antagonism(32).  
416 Therefore, we found that *Mesoflavibacter*, a representative of the intestinal probiotics  
417 of *C. japonica*, had a mutually promoting relationship with *Phaeobacter*, *Colwellia*,  
418 *Bacillus*, *Psychrobacter* and *Cohaesibacter*; *Rhodobacter* with *Emticia*, *Sphingobium*,

419 Bacillus, Haliscomenobacter and Reyranelia; and Polaribacter with Marinomonas and  
420 Bizionia (Figure 5). Kernbauer et al. (32) reported that some pathogens cause  
421 diarrhoea and can promote enterocyte colonization, which helps to restore structural  
422 and functional damage to the intestine caused by enteritis. As a typical conditional  
423 pathogen, *L. monocytogenes* is present in the intestine of many healthy individuals  
424 (33). To date, the biological significance of its presence has not been reported. This  
425 suggests that conditional pathogenic bacteria in the gut of healthy crabs may also have  
426 a symbiotic relationship with intestinal probiotics, promoting their growth and  
427 multiplication and enhancing their prebiotic effect. This study verifies that  
428 Phormidium interacts with Aeromonas and Azopira, and it can be inferred that  
429 *Aeromonas hydrophila*, a pathogenic bacterium in *Aeromonas*, can also promote the  
430 growth of other probiotics. It is hoped that more pathogens and probiotics will be  
431 selected for further study to examine this stimulatory effect and molecular mechanism  
432 and to explain this phenomenon more clearly.

433

434 Different tissues of animals, such as the skin, the hepatopancreas and the intestine,  
435 contain a large number of bacteria. Due to improvements in 16s sequencing  
436 technology, tens of millions of different microbial genes have been identified in the  
437 human gut, thus exceeding the number of other animal genomes by a factor of several  
438 hundred (34). This huge number of genes signifies that bacteria have a greater  
439 metabolic function in their hosts, synthesising essential amino acids and potentially  
440 participating in the metabolism of the host organism(35). As a result, the *C. japonica*

441 gut microbiome is considered to be a tissue with the metabolic potential to influence  
442 the metabolism of *C. japonica*. This is because the gut microbiome allows the  
443 nutrients contained in food to be processed and allows their components to be  
444 adsorbed and reused by crab cells. Thanks to improved methods of metabolite  
445 (metabolomics) analysis, recent analyses have shown that many of these metabolites  
446 originate from the metabolism of intestinal bacteria. Classes such as Mesoflavibacter  
447 showed positive correlations with pyruvic acid, myo-inosit-1-phosphate, beta-alanine,  
448 glutamic acid, histidine and alanine; Fusibacter showed positive correlations with  
449 alanine, myo-inositol, glycerol-3-phosphate, arginine and malic acid; Rhodobacter  
450 showed a positive correlation with malic acid, glutamine and histidine;  
451 Photobacterium showed a positive correlation with beta-alanine, alanine and histidine;  
452 Phormidium showed a positive correlation with beta-alanine, alanine and glutamine.  
453 This suggests that metabolites increased with the abundance of bacteria and therefore  
454 showed a positive correlation. It is possible that the autoimmune system and the entry  
455 of *A. hydrophila* into the intestinal tissues of *C. japonica* react immunologically and  
456 that the organism is producing certain metabolites which may be metabolised by  
457 various bacteria and absorbed into the circulation. In addition, some of these  
458 metabolites are modified or bound in the liver to produce microbiota-host co-  
459 metabolites(35). These microbial metabolites or co-metabolites can resist invasion by  
460 *A. hydrophila*. For example, through specific receptors such as short-chain fatty acids,  
461 indoles or myostatin, as described previously(36).

462

## 463 **5. Conclusion**

464 In conclusion, the results of this study suggest that some beneficial genera of bacteria  
465 in the intestine of *C. japonica* can inhibit *A. hydrophila* after infection. The most  
466 abundant metabolites in the gut of *C. japonica* infected with *A. hydrophila* were  
467 alanine metabolites. In this experiment, lipid, peroxide, SOD, i-NOS, phenol oxidase,  
468 GST and GSH and NO levels were found to be decreased in *C. japonica* infected with  
469 *A. hydrophila* in the intestine. The enzymatic activity of THL, HK and PK was  
470 upregulated in *A. hydrophila*-infected *C. japonica*. The probiotics in the intestinal  
471 tract of *C. japonica* have a mutually reinforcing relationship, promoting their growth  
472 and reproduction and enhancing their prebiotic effect. *C. japonica* metabolites showed  
473 a positive correlation with probiotic flora, suggesting that metabolites increased with  
474 the abundance of bacteria and that microbial metabolites or co-metabolites could  
475 resist invasion by *A. hydrophila*. The above results may contribute to further studies  
476 investigating the resistance of the crab to invading pathogenic bacteria. They also  
477 provide information for future research on relevant probiotic and metabolite pathways.  
478

## 479 **6. Acknowledgements**

480 The authors would like to thank for Mengling Sun her help of sampling. This  
481 work was supported by National Key R&D Program of China (2020YFD0900305)  
482 Science Foundation of Jiangsu (NO. BK20191488) in China, Major project of  
483 hydrobios resources in Jiangsu province (ZYHB16-3) and agricultural major new  
484 variety creation project in Jiangsu province (PZCZ201743).

485

486 **Reference**

- 487 1. **Sudo H, Kajihara N, Fujii T.** 2008. Predation by the swimming crab *Charybdis*  
488 *japonica* and piscivorous fishes: a major mortality factor in hatchery-reared juvenile  
489 Japanese flounder *Paralichthys olivaceus* released in Mano Bay, Sado Island, Japan.  
490 *Fisheries Research* **89**:49-56.
- 491 2. **Zhao C, Ji N, Zhang B, Sun P, Feng W, Wei J, Chang Y.** 2014. Effects of covering  
492 behavior and exposure to a predatory crab *Charybdis japonica* on survival and  
493 HSP70 expression of juvenile sea urchins *Strongylocentrotus intermedius*. *PloS one*  
494 **9**:e97840.
- 495 3. **Xu XY, Shen YB, Fu JJ, Liu F, Guo SZ, Yang XM, Li JL.** 2012. Matrix  
496 metalloproteinase 2 of grass carp *Ctenopharyngodon idella* (CiMMP2) is involved in  
497 the immune response against bacterial infection. *Fish & Shellfish Immunology* **33**.
- 498 4. **Burr G, Gatlin D, Ricke S.** 2010. Microbial Ecology of the Gastrointestinal Tract of  
499 Fish and the Potential Application of Prebiotics and Probiotics in Finfish Aquaculture.  
500 *Journal of the World Aquaculture Society* **36**.
- 501 5. **Yuan YL, Xiao AX, Wu QY, Wen HL, You SL.** 2008. Infection with *Hematodinium* sp.  
502 in mud crabs *Scylla serrata* cultured in low salinity water in southern China. *Diseases*  
503 *of Aquatic Organisms* **82**:145-150.
- 504 6. **Givens CE, Burnett KG, Burnett LE, Hollibaugh JT.** 2013. Microbial communities of  
505 the carapace, gut, and hemolymph of the Atlantic blue crab, *Callinectes sapidus*.  
506 *Marine biology* **160**:2841-2851.

- 507 7. **Jagadeesan B, Gerner-Smidt P, Allard MW, Leuillet S, Winkler A, Xiao Y, Chaffron S,**  
508 **Van Der Vossen J, Tang S, Katase M.** 2019. The use of next generation sequencing  
509 for improving food safety: translation into practice. *Food microbiology* **79**:96-115.
- 510 8. **Liu H, Wang L, Liu M, Wang B, Jiang K, Ma S, Li Q.** 2011. The intestinal microbial  
511 diversity in Chinese shrimp (*Fenneropenaeus chinensis*) as determined by PCR–  
512 DGGE and clone library analyses. *Aquaculture* **317**:32-36.
- 513 9. **Li S, Sun L, Wu H, Hu Z, Liu W, Li Y, Wen X.** 2012. The intestinal microbial diversity  
514 in mud crab (*Scylla paramamosain*) as determined by PCR-DGGE and clone library  
515 analysis. *Journal of applied microbiology* **113**:1341-1351.
- 516 10. **Wu H-J, Sun L-B, Li C-B, Li Z-Z, Zhang Z, Wen X-B, Hu Z, Zhang Y-L, Li S-K.** 2014.  
517 Enhancement of the immune response and protection against *Vibrio*  
518 *parahaemolyticus* by indigenous probiotic *Bacillus* strains in mud crab (*Scylla*  
519 *paramamosain*). *Fish & shellfish immunology* **41**:156-162.
- 520 11. **Lankadurai BP, Nagato EG, Simpson MJ.** 2013. Environmental metabolomics: an  
521 emerging approach to study organism responses to environmental stressors.  
522 *Environmental Reviews* **21**:180-205.
- 523 12. **Gago-Tinoco A, González-Domínguez R, García-Barrera T, Blasco-Moreno J,**  
524 **Bebianno MJ, Gómez-Ariza J-L.** 2014. Metabolic signatures associated with  
525 environmental pollution by metals in Doñana National Park using *P. clarkii* as  
526 bioindicator. *Environmental Science and Pollution Research* **21**:13315-13323.
- 527 13. **Wang J, Huang Y, Xu K, Zhang X, Sun H, Fan L, Yan M.** 2019. White spot syndrome  
528 virus (WSSV) infection impacts intestinal microbiota composition and function in



- 529 Litopenaeus vannamei. Fish & shellfish immunology **84**:130-137.
- 530 14. **Sharifah EN, Eguchi M.** 2011. The phytoplankton Nannochloropsis oculata enhances  
531 the ability of Roseobacter clade bacteria to inhibit the growth of fish pathogen Vibrio  
532 anguillarum. PLoS One **6**:e26756.
- 533 15. **Porsby CH, Nielsen KF, Gram L.** 2008. Phaeobacter and Ruegeria species of the  
534 Roseobacter clade colonize separate niches in a Danish turbot (Scophthalmus  
535 maximus)-rearing farm and antagonize Vibrio anguillarum under different growth  
536 conditions. Applied and environmental microbiology **74**:7356-7364.
- 537 16. **She R, Li T-T, Luo D, Li J-B, Yin L-Y, Li H, Liu Y-M, Li X-Z, Yan Q-g.** 2017. Changes  
538 in the intestinal microbiota of gibel carp (Carassius gibelio) associated with cyprinid  
539 herpesvirus 2 (CyHV-2) infection. Current microbiology **74**:1130-1136.
- 540 17. **Nedashkovskaya OI, Kim S-G, Balabanova LA, Zhukova NV, Bakunina IY, Mikhailov**  
541 **VV.** 2018. Polaribacter staleyi sp. nov., a polysaccharide-degrading marine bacterium  
542 isolated from the red alga Ahnfeltia tobuchiensis. International journal of systematic  
543 and evolutionary microbiology **68**:623-629.
- 544 18. **Belhaj D, Frikha D, Athmouni K, Jerbi B, Ahmed MB, Bouallagui Z, Kallel M, Maalej S,**  
545 **Zhou J, Ayadi H.** 2017. Box-Behnken design for extraction optimization of crude  
546 polysaccharides from Tunisian Phormidium versicolor cyanobacteria (NCC 466):  
547 partial characterization, in vitro antioxidant and antimicrobial activities. International  
548 journal of biological macromolecules **105**:1501-1510.
- 549 19. **Duan Y, Wang Y, Liu Q, Dong H, Li H, Xiong D, Zhang J.** 2019. Changes in the  
550 intestine microbial, digestion and immunity of Litopenaeus vannamei in response to

- 551 dietary resistant starch. Scientific reports **9**:1-10.
- 552 20. **Yang X, Yousef AE.** 2018. Antimicrobial peptides produced by *Brevibacillus* spp.:  
553 structure, classification and bioactivity: a mini review. World journal of microbiology  
554 and biotechnology **34**:1-10.
- 555 21. **Drobysheva AV, Panafidina SA, Kolesnik MV, Klimuk EI, Sokolova ML.** 2020.  
556 Structure and function of virion RNA polymerase of a crAss-like phage. Nature:1-4.
- 557 22. **Karlsson A, Eliason EJ, Mydland LT, Farrell AP, Kiessling A.** 2006. Postprandial  
558 changes in plasma free amino acid levels obtained simultaneously from the hepatic  
559 portal vein and the dorsal aorta in rainbow trout (*Oncorhynchus mykiss*). Journal of  
560 Experimental Biology **209**:4885-4894.
- 561 23. **Youngson A, Cowey C, Walton M.** 1982. Some properties of serine pyruvate  
562 aminotransferase purified from liver of rainbow trout *Salmo gairdneri*. Comparative  
563 Biochemistry and Physiology Part B: Comparative Biochemistry **73**:393-398.
- 564 24. **Weihrauch D, Wilkie MP, Walsh PJ.** 2009. Ammonia and urea transporters in gills of  
565 fish and aquatic crustaceans. Journal of experimental biology **212**:1716-1730.
- 566 25. **Ip YK, Lem C, Chew SF, Wilson JM, Randall DJ.** 2001. Partial amino acid catabolism  
567 leading to the formation of alanine in *Periophthalmodon schlosseri* (mudskipper): a  
568 strategy that facilitates the use of amino acids as an energy source during locomotory  
569 activity on land. Journal of Experimental Biology **204**:1615-1624.
- 570 26. **Chew SF, Wong MY, Tam WL, Ip YK.** 2003. The snakehead *Channa asiatica*  
571 accumulates alanine during aerial exposure, but is incapable of sustaining locomotory  
572 activities on land through partial amino acid catabolism. Journal of experimental

- 573 biology **206**:693-704.
- 574 27. **Hipkiss AR, Brownson C, Carrier MJ.** 2001. Carnosine, the anti-ageing, anti-oxidant  
575 dipeptide, may react with protein carbonyl groups. *Mechanisms of Ageing &*  
576 *Development* **122**:1431-1445.
- 577 28. **Chen YY, Chen JC, Lin YC, Su-Tuen Y, Huang CL.** 2015. White Shrimp *Litopenaeus*  
578 *vannamei* That Have Received *Gracilaria tenuistipitata* Extract Show Early Recovery  
579 of Immune Parameters after Ammonia Stressing. *Marine Drugs* **13**.
- 580 29. **Chen YY, Sim SS, Chiew SL, Yeh ST, Liou CH, Chen JC.** 2012. Dietary  
581 administration of a *Gracilaria tenuistipitata* extract produces protective immunity of  
582 white shrimp *Litopenaeus vannamei* in response to ammonia stress. *Aquaculture*  
583 **370-371**:26-31.
- 584 30. **Salminen S, Nybom S, Meriluoto J, Collado MC, Vesterlund S, El-Nezami H.** 2010.  
585 Interaction of probiotics and pathogens—benefits to human health? *Current opinion in*  
586 *biotechnology* **21**:157-167.
- 587 31. **Gagnon M, Zihler A, Chassard C, Lacroix C.** 2011. Ecology of probiotics and enteric  
588 protection, p. 65-85, *Probiotic Bacteria and Enteric Infections*. Springer.
- 589 32. **Kernbauer E, Ding Y, Cadwell K.** 2014. An enteric virus can replace the beneficial  
590 function of commensal bacteria. *Nature* **516**:94-98.
- 591 33. **Adzitey F, Huda N.** 2010. *Listeria monocytogenes* in foods: incidences and possible  
592 control measures. *African Journal of Microbiology Research* **4**:2848-2855.
- 593 34. **Tierney BT, Yang Z, Lubber JM, Beaudin M, Wibowo MC, Baek C, Mehlenbacher E,**  
594 **Patel CJ, Kostic AD.** 2019. The landscape of genetic content in the gut and oral

595 human microbiome. *Cell host & microbe* **26**:283-295. e288.

596 35. **Holmes E, Li J, Marchesi J, Nicholson J.** 2012. Gut Microbiota Composition and  
597 Activity in Relation to Host Metabolic Phenotype and Disease Risk. *Cell Metabolism*  
598 **16**:559-564.

599 36. **Rahim MA, Chilloux J, Martinez-Gili L, Neves AL, Myridakis A, Gooderham N, Dumas**  
600 **ME.** 2019. Diet-induced metabolic changes of the human gut microbiome: importance  
601 of short-chain fatty acids, methylamines and indoles. *Acta Diabetologica*.

602

603 Table 1 Statistical table of DADA2 denoising to generate (Operational Taxonomic  
604 Units) OTUs.

| sample-id | input   | filtered | denoised | merged  | non-chimeric |
|-----------|---------|----------|----------|---------|--------------|
| AH1       | 51820.0 | 46995.0  | 46995.0  | 46262.0 | 42540.0      |
| AH2       | 53801.0 | 48149.0  | 48149.0  | 44588.0 | 27026.0      |
| AH3       | 40419.0 | 37184.0  | 37184.0  | 34778.0 | 16628.0      |
| AH4       | 48431.0 | 43146.0  | 43146.0  | 41123.0 | 33171.0      |
| AH5       | 58952.0 | 53367.0  | 53367.0  | 49501.0 | 25823.0      |
| AH6       | 49210.0 | 44315.0  | 44315.0  | 43513.0 | 40142.0      |
| CK1       | 52331.0 | 47532.0  | 47532.0  | 43157.0 | 21781.0      |
| CK2       | 48898.0 | 44245.0  | 44245.0  | 40835.0 | 22046.0      |
| CK3       | 38808.0 | 34699.0  | 34699.0  | 33159.0 | 26160.0      |
| CK4       | 43823.0 | 39674.0  | 39674.0  | 38840.0 | 27073.0      |
| CK5       | 58821.0 | 53665.0  | 53665.0  | 50405.0 | 27483.0      |
| CK6       | 32453.0 | 28733.0  | 28733.0  | 26260.0 | 14226.0      |

605

606 Figure 1: Workflow for the analysis of 16SRNA and metabolomic data in response to  
607 berberine.

608

609 Figure 2: (A) Histogram of the relative distribution of each subgroup at the phylum  
610 level (top 15 species in relative abundance), the vertical coordinate (sequence number  
611 percent) indicates the ratio of the number of sequences annotated to that phylum level  
612 to the total annotated data, the top-down colour order of the histogram corresponds to  
613 the colour order of the legend on the right. *C. japonica* injected with  $10^5$  CFU/L of *A.*  
614 *hydrophila* (AH) and control (CK). (B) Venn diagram of shared or endemic species  
615 (when the number of subgroups is less than or equal to 5). (C) Box plot of Shannon's  
616 index for *C. japonica* injected with  $10^5$  CFU/L of *A. hydrophila* (AH) and control  
617 (CK).

618

619 Figure 3: (A) Heat map of the phylogenetic evolutionary tree and the distribution of  
620 abundance between groups. The evolutionary tree is shown on the left, the different  
621 coloured branches represent different clades and each end branch represents an OTU.  
622 The end annotates the genus classification to which the corresponding OTU belongs.  
623 The heat map on the right is the normalised abundance. The mean of the abundance is  
624 0 and the standard deviation is 0.5. Twelve samples were divided into two groups: AH  
625 and CK. (B) Species interaction network at the taxonomic level. Circles represent a  
626 species, the size represents its relative abundance, different colours represent different  
627 species phylum classifications, lines between circles represent a significant correlation  
628 between these two species (p-value less than 0.05). Red lines indicate positive  
629 correlations, blue lines indicate negative correlations. The thicker the line, the larger  
630 the absolute value of the correlation coefficient.

631

632 Figure 4: (A) Histogram of the top 20 metabolites. *C. japonica* injected with  $10^5$   
633 CFU/L of *A. hydrophila* (AH) and control (CK). (B) PLS-DA point cloud, *C. japonica*  
634 injected with  $10^5$  CFU/L of *A. hydrophila* (AH) and control (CK). (C) The top 15  
635 metabolites in the random forest. The horizontal coordinate on the left panel is "Mean  
636 Decrease Accuracy"; the right panel is a heat map of the levels of the 15 metabolites  
637 in the two subgroups. *C. japonica* injected with  $10^5$  CFU/L of *A. hydrophila* (AH) and  
638 the control group (CK).

639

640 Figure 5: (A) RA enrichment analysis, the horizontal coordinate is the enrichment  
641 multiplier, which is the number of observed metabolites/theoretical metabolites in the  
642 metabolic pathway. The p-value magnitude is indicated by colour, the darker the  
643 colour, the smaller the p-value. (B) Association analysis results in the horizontal axis  
644 are metabolites, vertical axis are genus. Colours represent the r value, red indicates  
645 positive correlation, blue indicates negative correlation. The darker the colour the  
646 stronger the correlation; asterisks indicate that the p-value of the correlation is less  
647 than or equal to 2.50. (C) Metabolites and metabolic pathways in *C. japonica*  
648 (*Acipenser japonicus*) after infection with *A. hydrophila*. The red metabolites are  
649 those that differed significantly between subgroups

650

651 Figure 6: Relevant enzymes in hepatopancreas tissue of *C. japonica* treated with *A.*  
652 *hydrophila*. AH, the experimental group; CK, the control group. \*Significantly ( $P <$

653 0.05) different from control values.

654

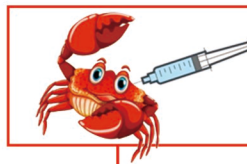

*Aeromonas hydrophila*  
 $10^5$  (CFU)/L

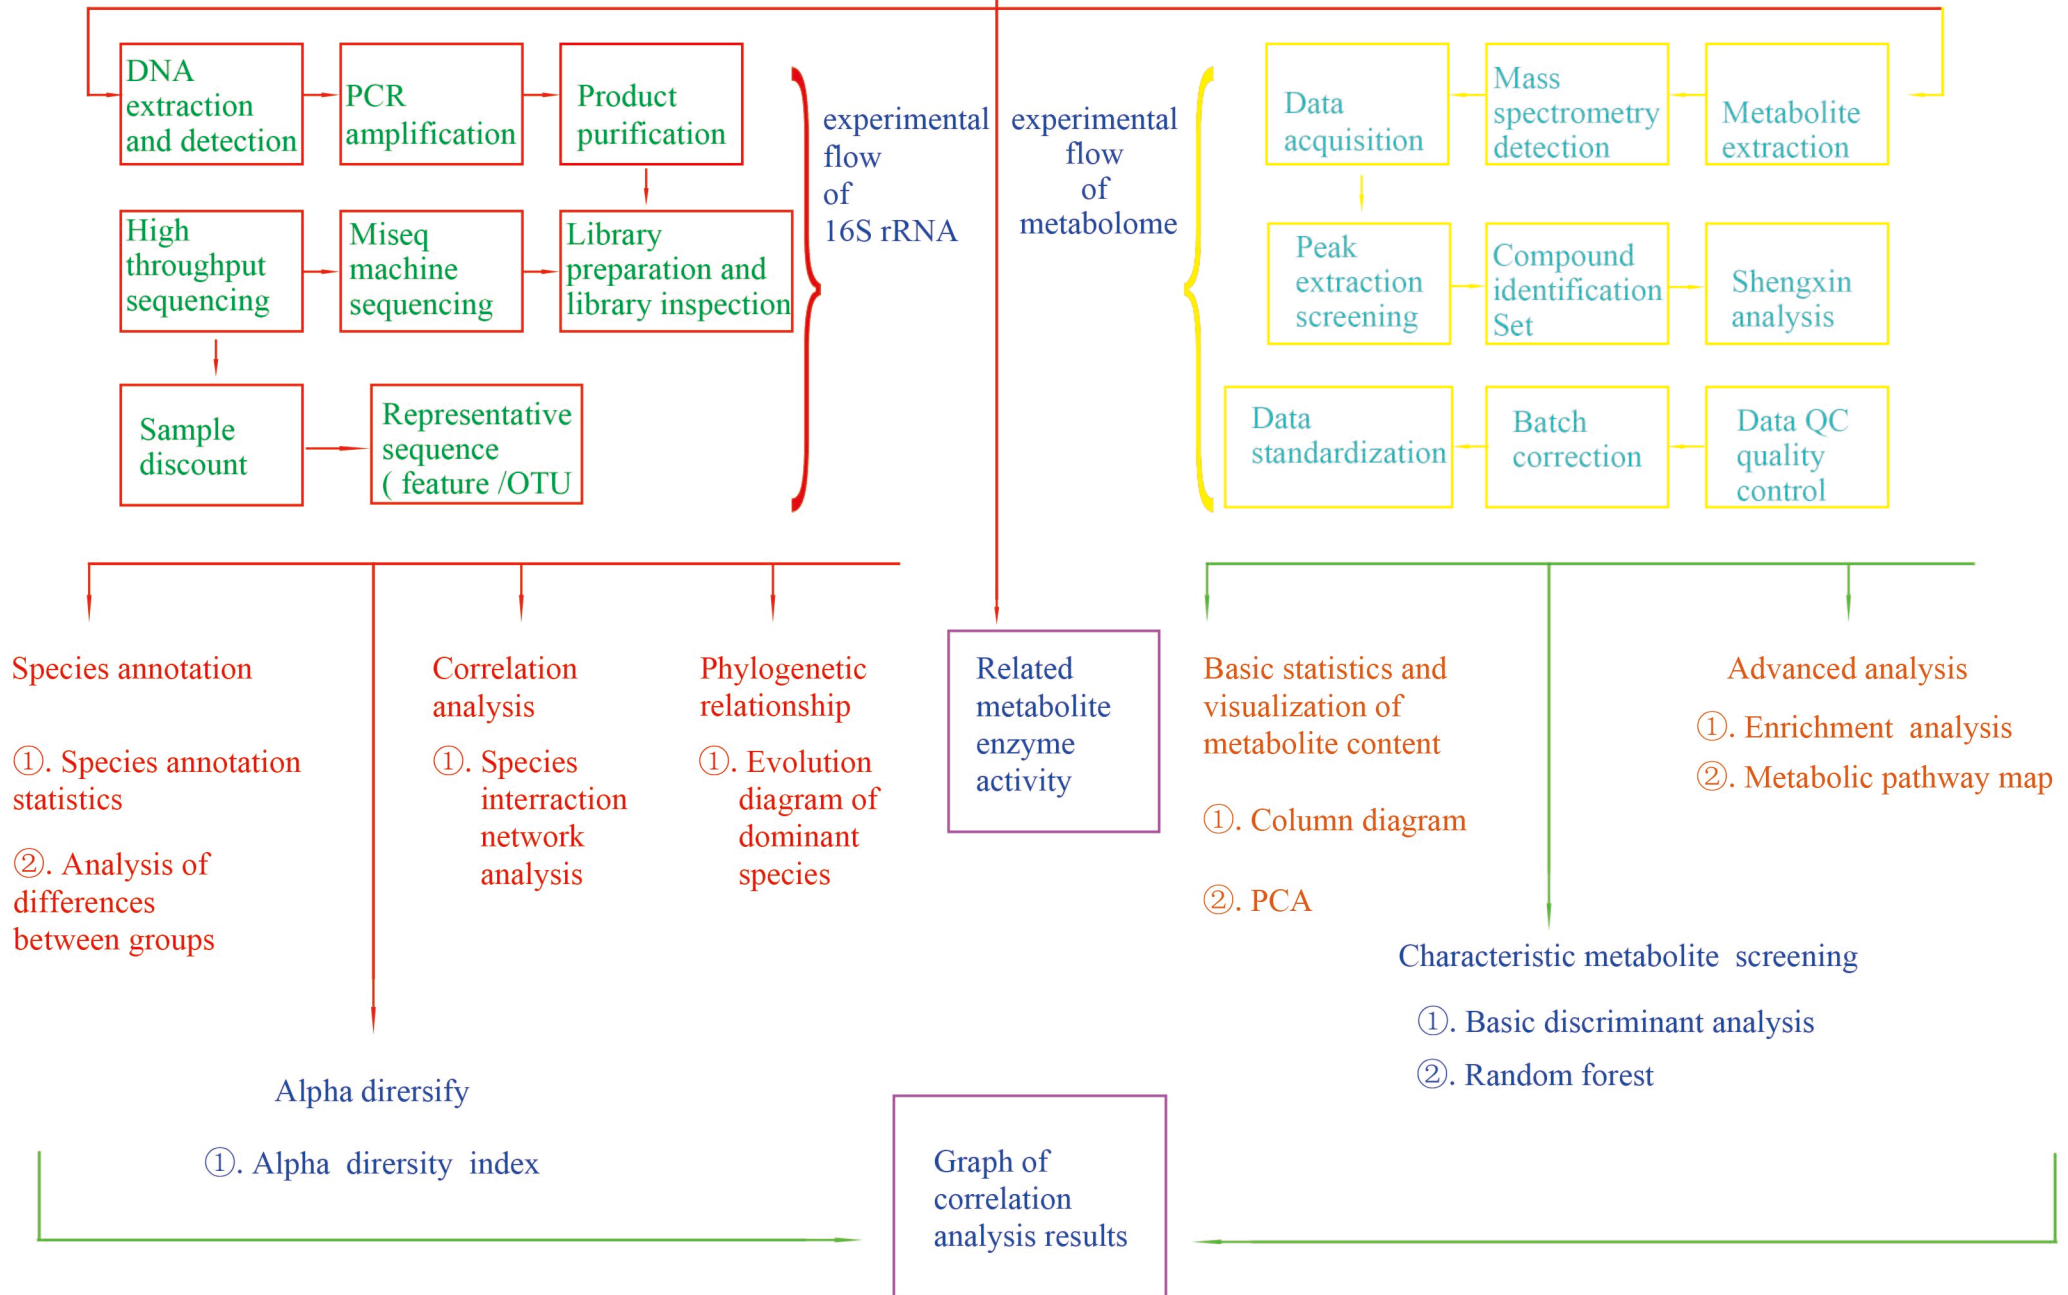



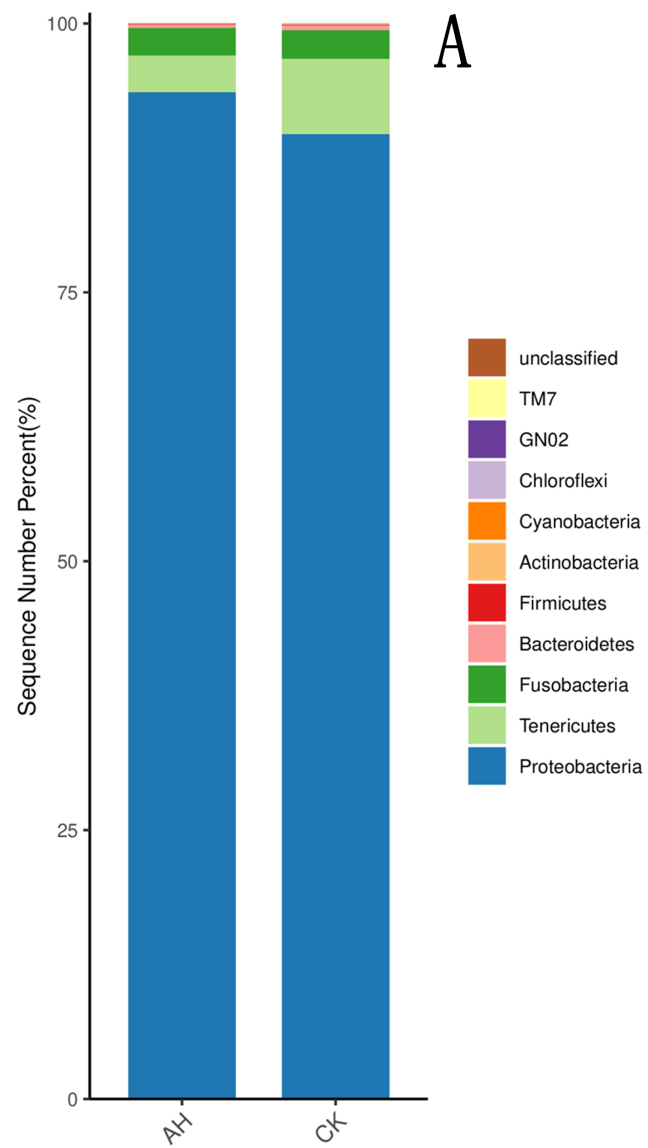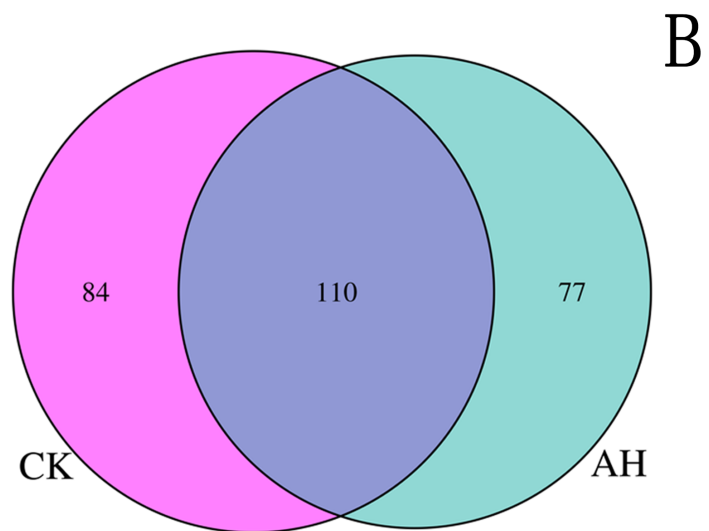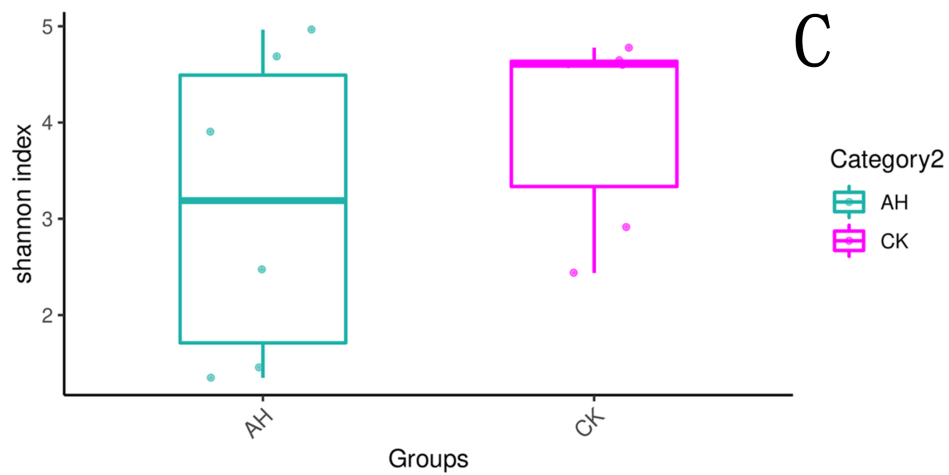

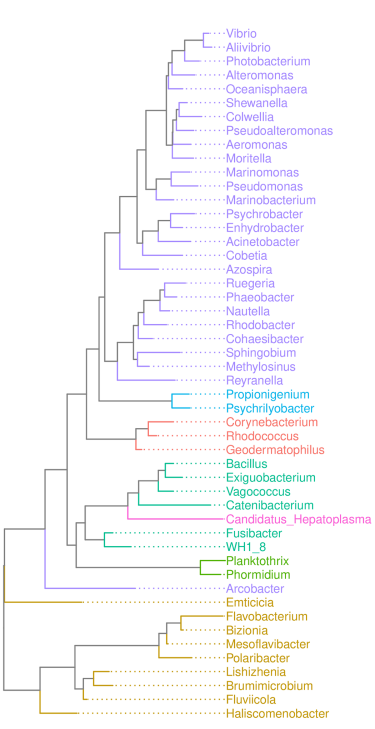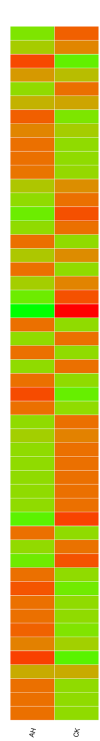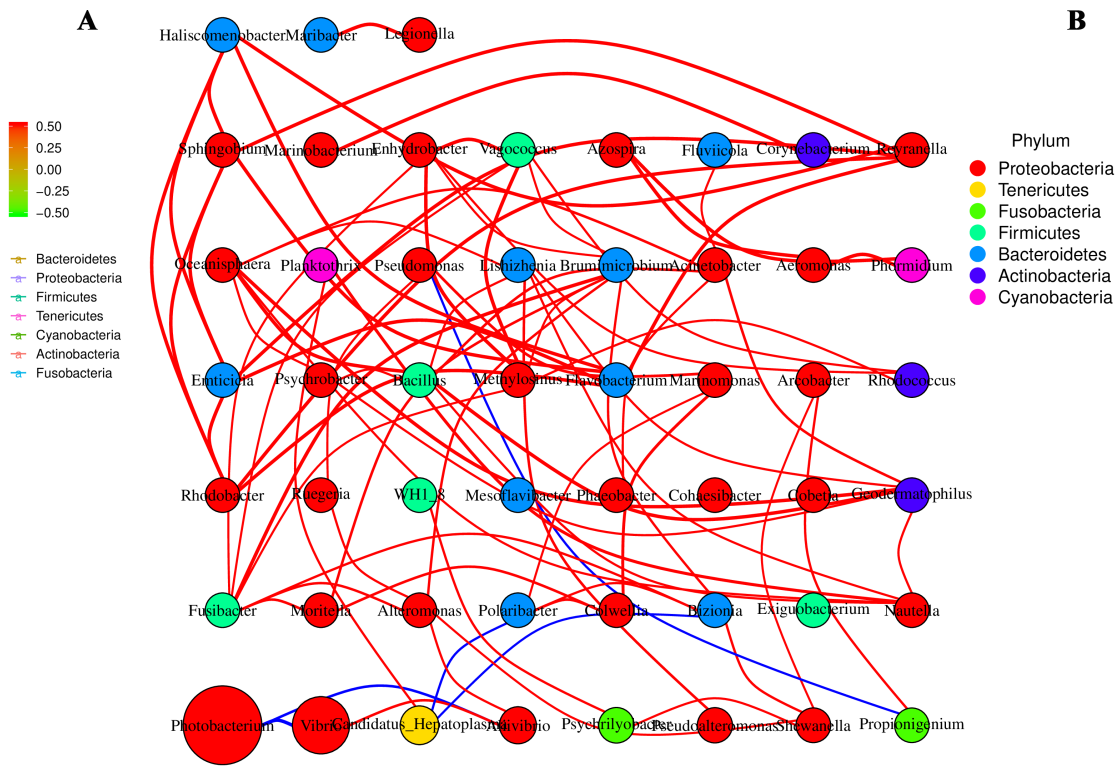

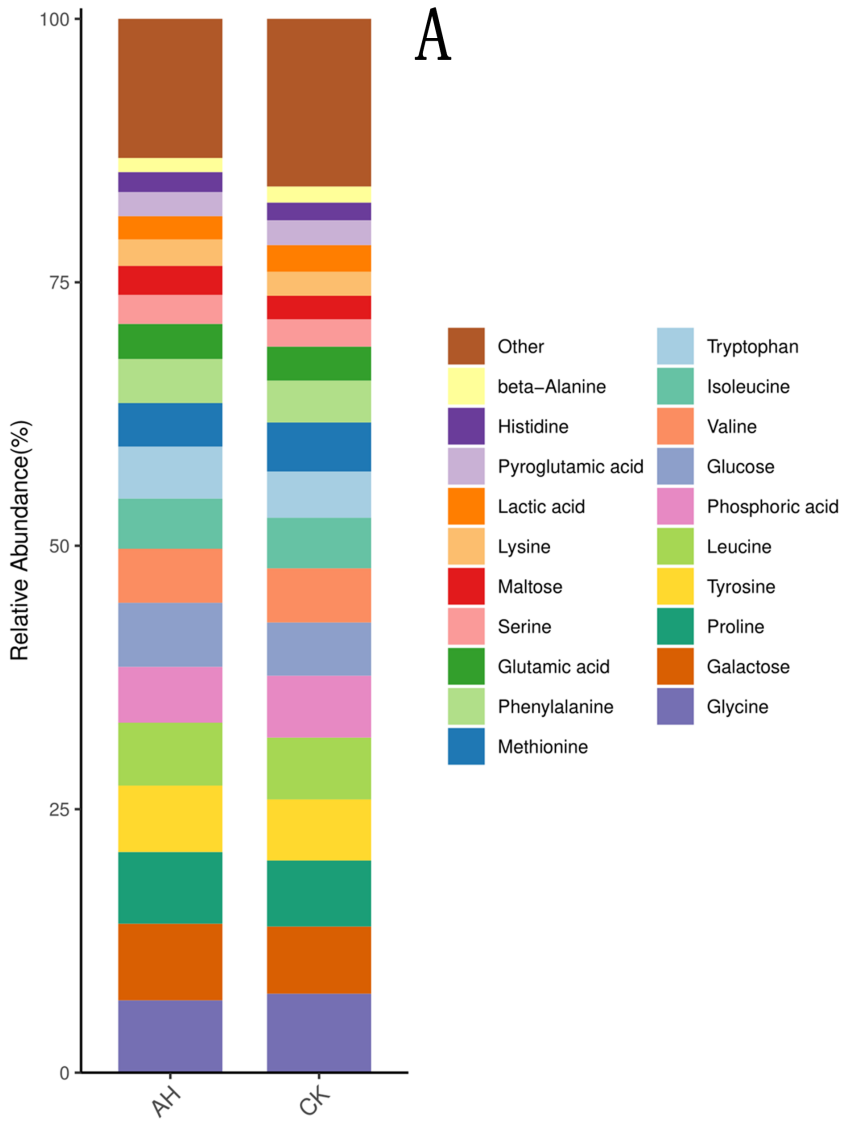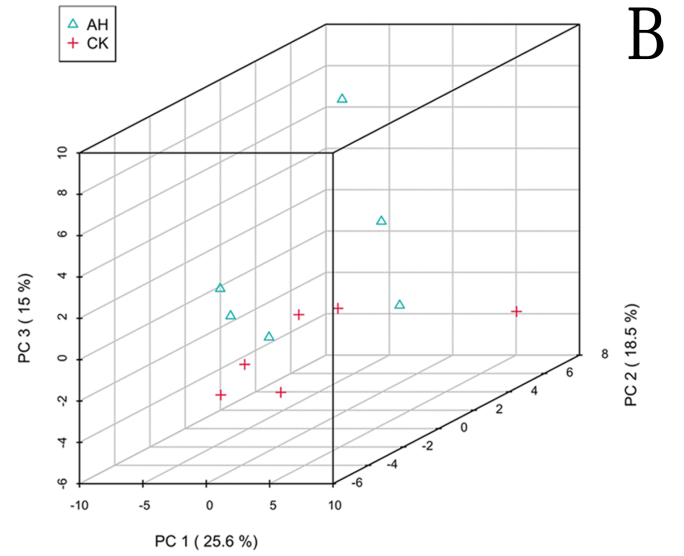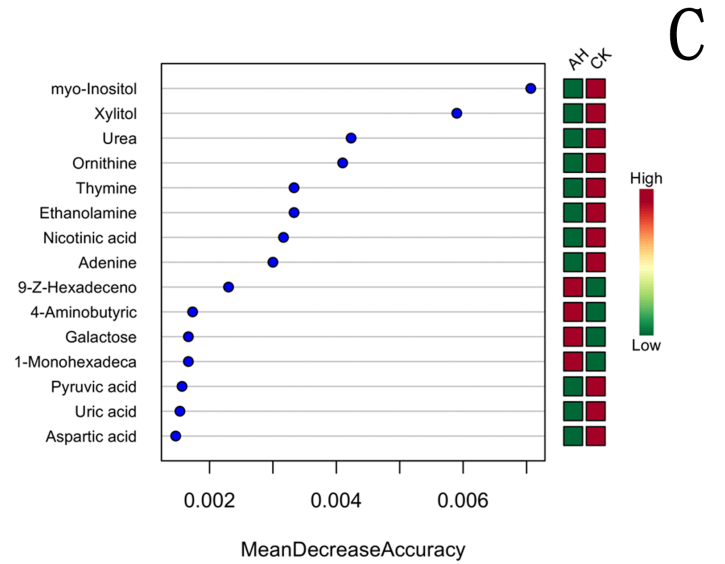



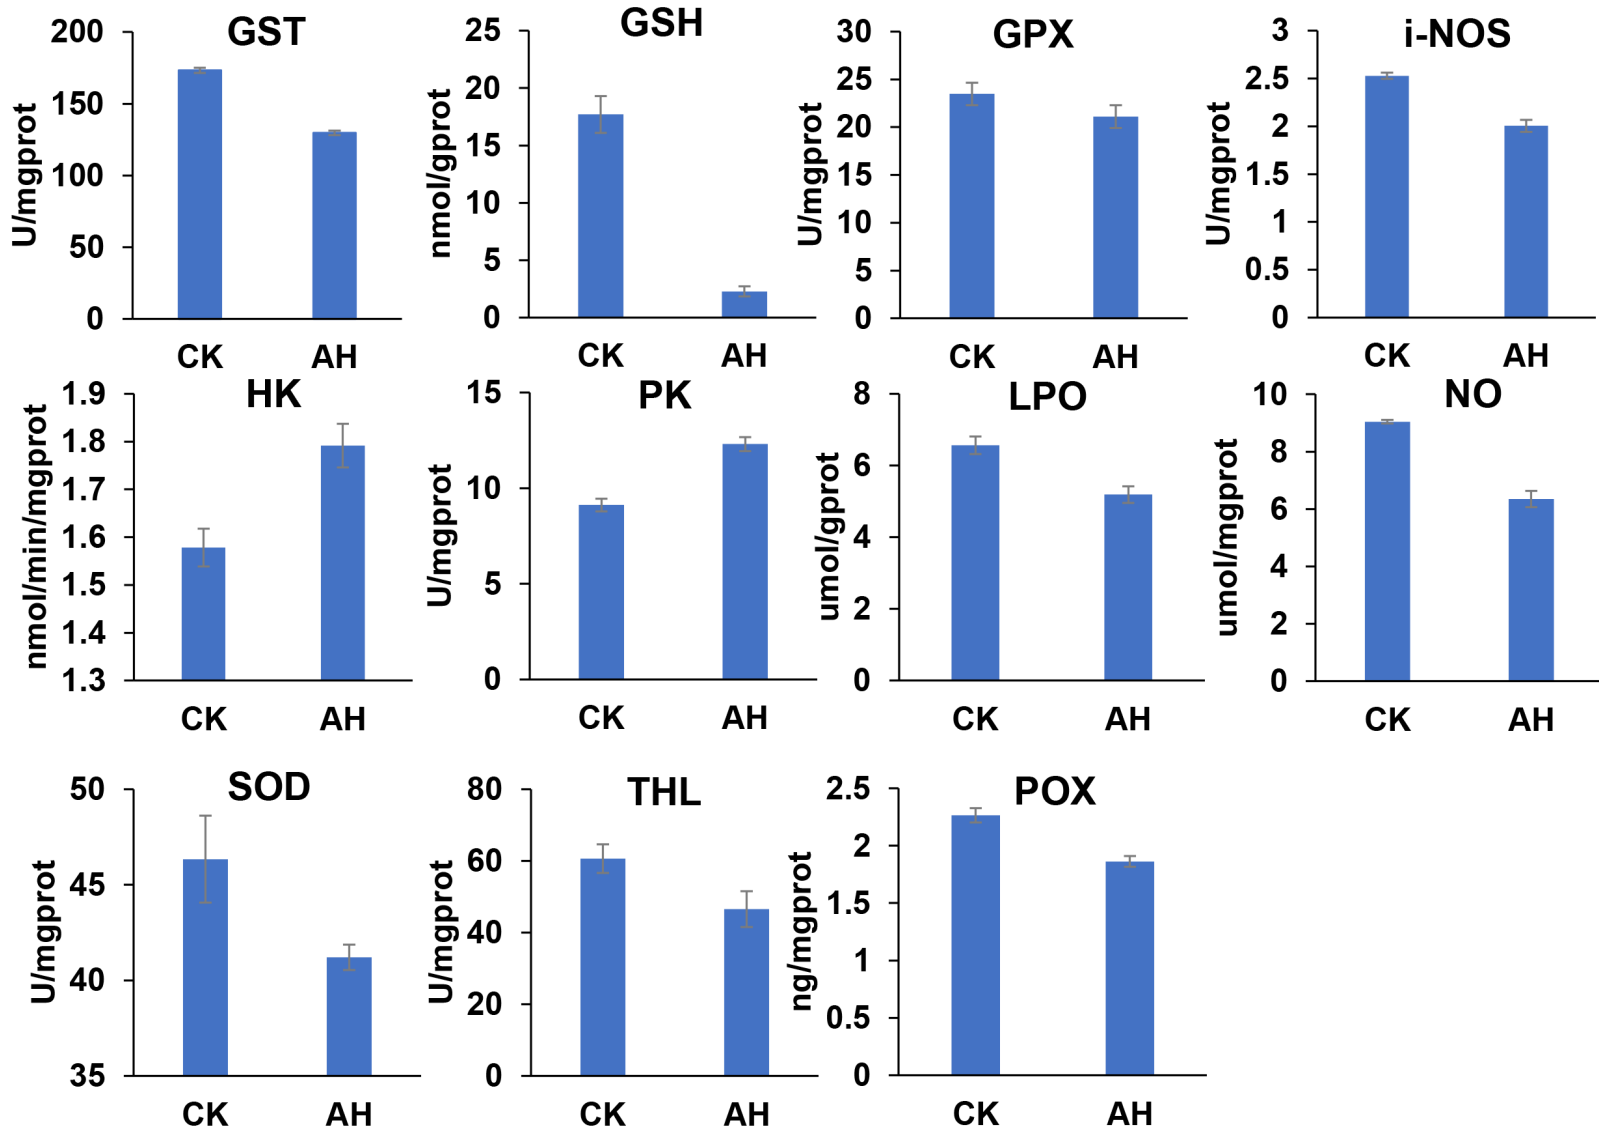

Source: https://www.biorxiv.org/content/10.1101/2021.10.25.465830v1.full.pdf
